# Supplementary material
Source: publisher site journal article supplement (https://www.dovepress.com/get_supplementary_file.php?f=243452.docx)

**Table S1: Univariate and multivariate Cox regression analysis of overall survival**

|  | **Univariate analysis** | | | | **Multivariate analysis** | | | |
| --- | --- | --- | --- | --- | --- | --- | --- | --- |
| **Variable** | HR | LCI | UCI | P value | HR | LCI | UCI | *P* value |
| **MMP11 expression** | 1.057 | 0.995 | 1.123 | 0.028 | 1.075 | 0.966 | 1.196 | 0.183 |
| **Gender** | 1.108 | 0.798 | 1.537 | 0.540 |  |  |  |  |
| **Age** | 1.033 | 1.017 | 1.048 | <0.001 | 1.022 | 0.996 | 1.048 | 0.102 |
| **T stage** | 1.655 | 1.324 | 2.068 | <0.001 | 1.345 | 0.836 | 2.162 | 0.222 |
| **N stage** | 1.564 | 1.328 | 1.841 | <0.001 | 1.291 | 0.795 | 2.095 | 0.301 |
| **M stage** | 3.303 | 1.579 | 6.912 | 0.002 | 1.128 | 0.390 | 3.262 | 0.825 |
| **Pathologic stage** | 1.718 | 1.418 | 2.080 | <0.001 | 1.110 | 0.573 | 2.151 | 0.757 |
| **Histological grade** | 2.905 | 0.719 | 11.743 | 0.135 |  |  |  |  |

**Table S2: The clinical characteristics in bladder cancer tissue microarray**

| **Characteristics** | **N (%)** |
| --- | --- |
| Sex |  |
| Male | 21 (70) |
| Female | 9 (30) |
| **Pathologic stage** |  |
| I | 1 (3.3) |
| II | 7 (23.3) |
| III | 12 (40) |
| IV | 10 (33.3) |
| NA | 0 |
| **Histological grade** |  |
| High grade | 27(90) |
| Low grade | 3(10) |
| N/A | 0 |

**Figure S1** An illustration of optimal cutoff identiﬁcation for grouping samples in TCGA BLCA cohort. (**A**) Normalized and log2-transformed MMP11 expression values form Normal (Gaussian) distribution. (**B-C**) R package “maxstat” was employed for grouping samples to generate maximally difference in patient overall survival. (**D**) Kaplan-Meier survival curve showing inverse association between MMP11 expression and 5-year overall survival in bladder cancer. Log-rank test was performed in (**C**-**D**).


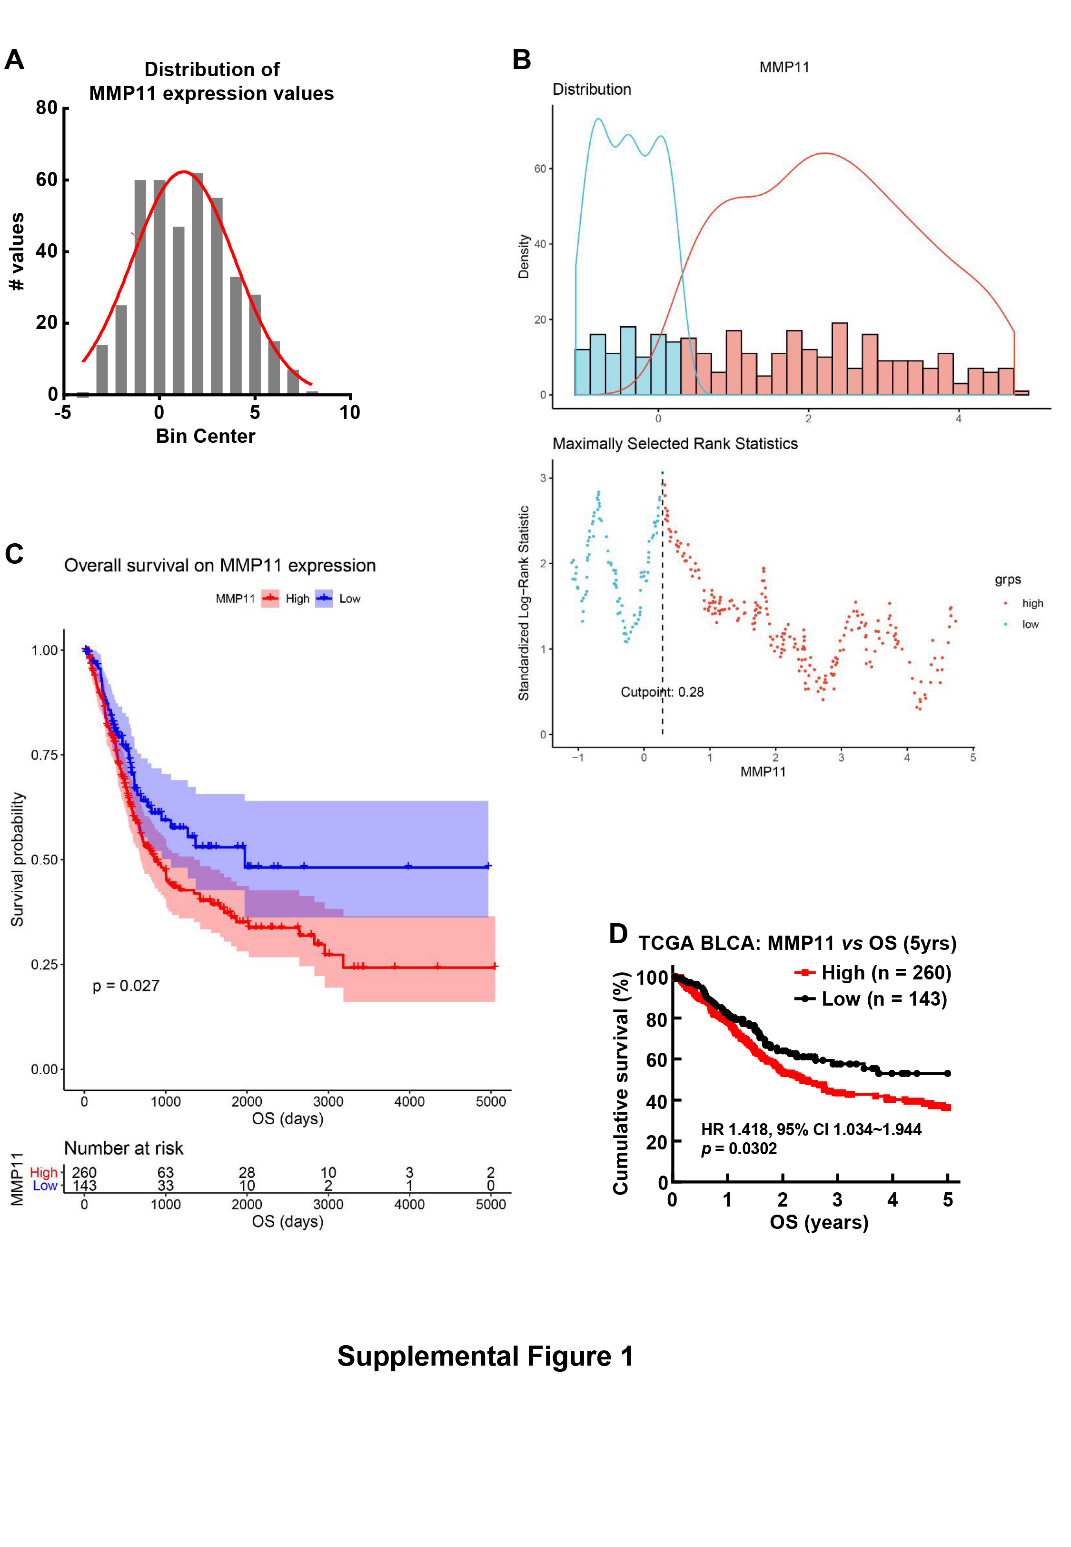


**Figure S2** Expression profile of MMP11 in various molecular subtypes of BLCA. These data were analyzed and downloaded from [**http://ualcan.path.uab.edu/cgi-bin/TCGAExResultNew2.pl?genenam=MMP11&ctype=BLCA&add=0**](http://ualcan.path.uab.edu/cgi-bin/TCGAExResultNew2.pl?genenam=MMP11&ctype=BLCA&add=0)**.**


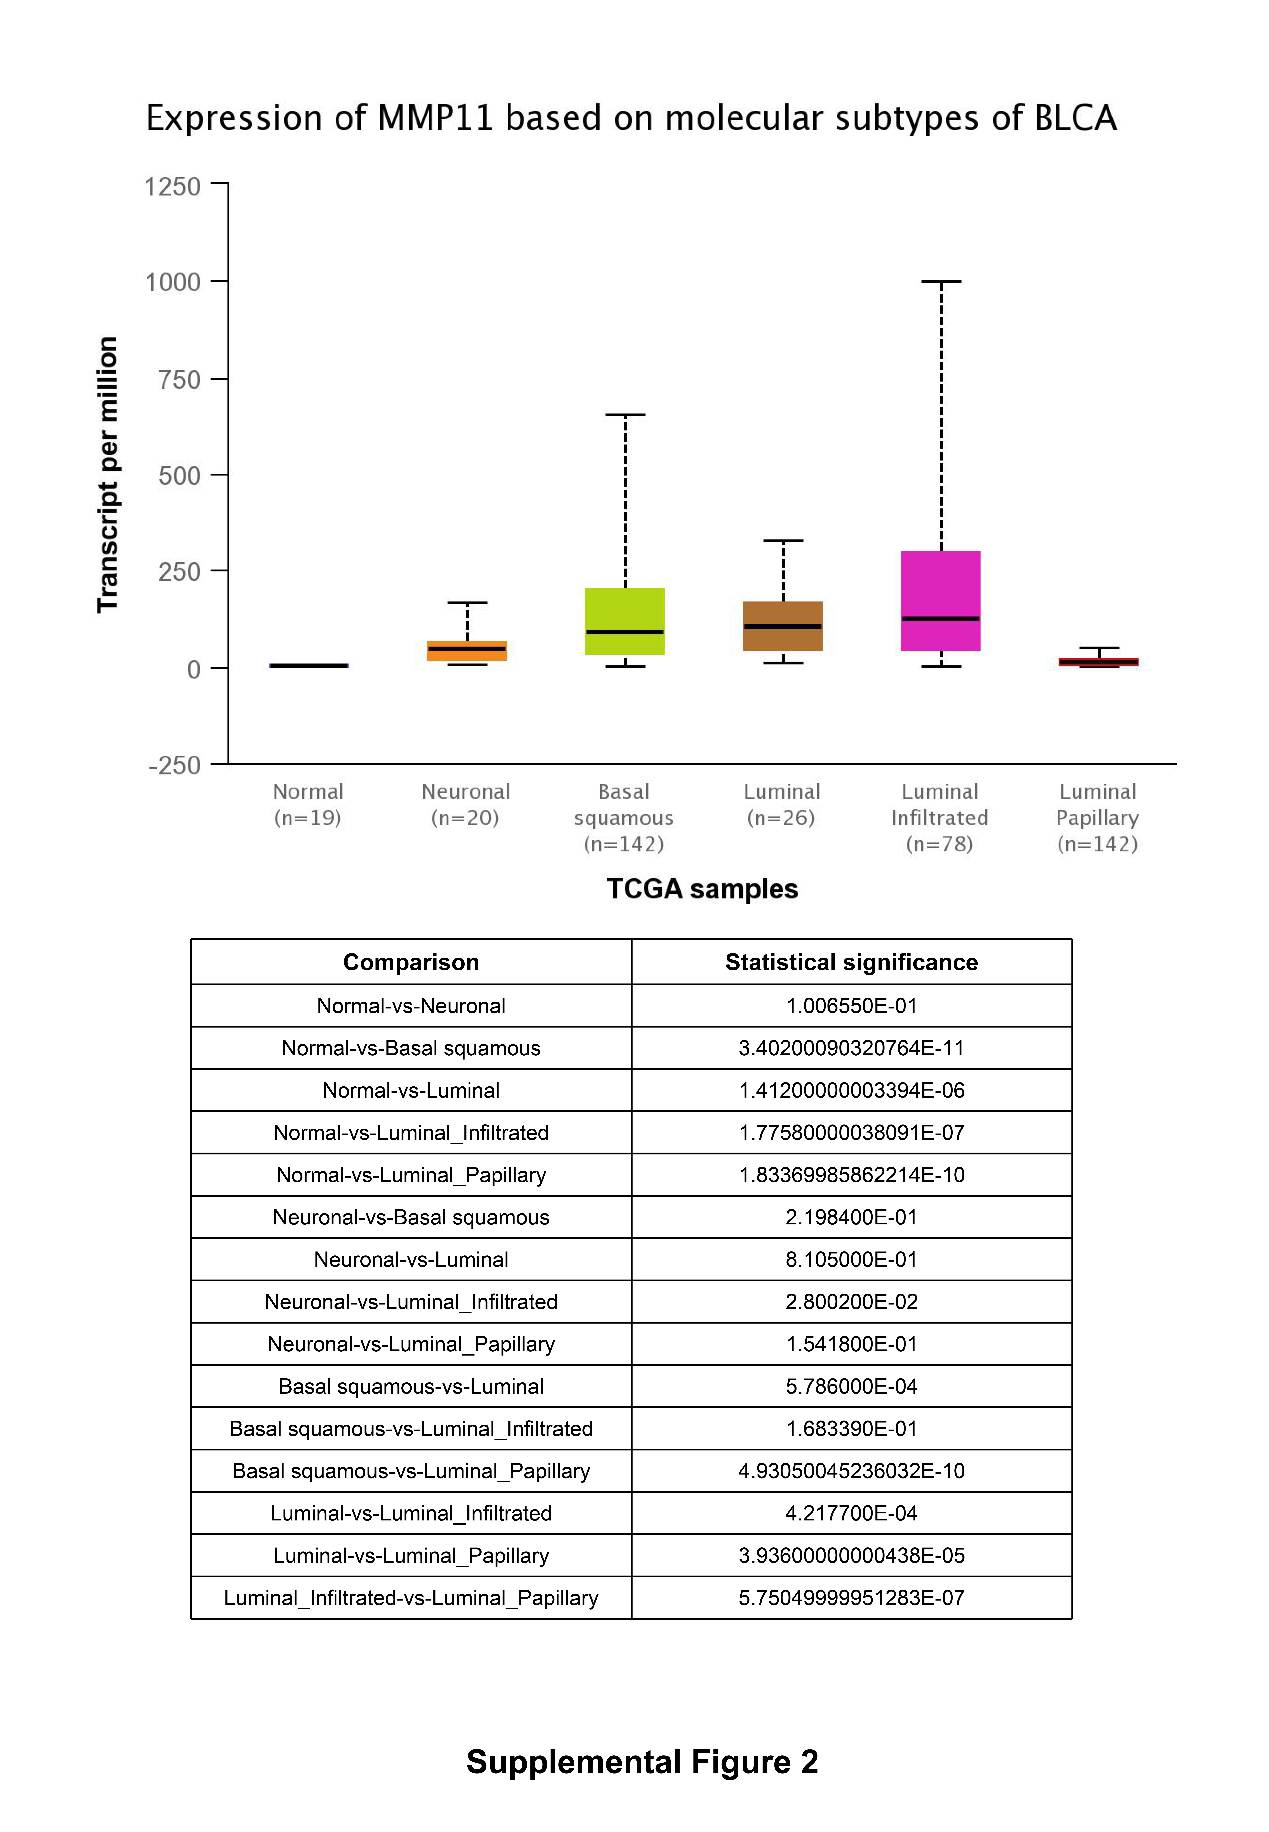


**Figure S3** Genomic information in *MMP11* gene locus in TCGA BLCA cohort. (**A**) No mutation occurs in *MMP11* gene in bladder cancer. (**B**) No significant gene amplification in *MMP11* gene locus in bladder cancer.


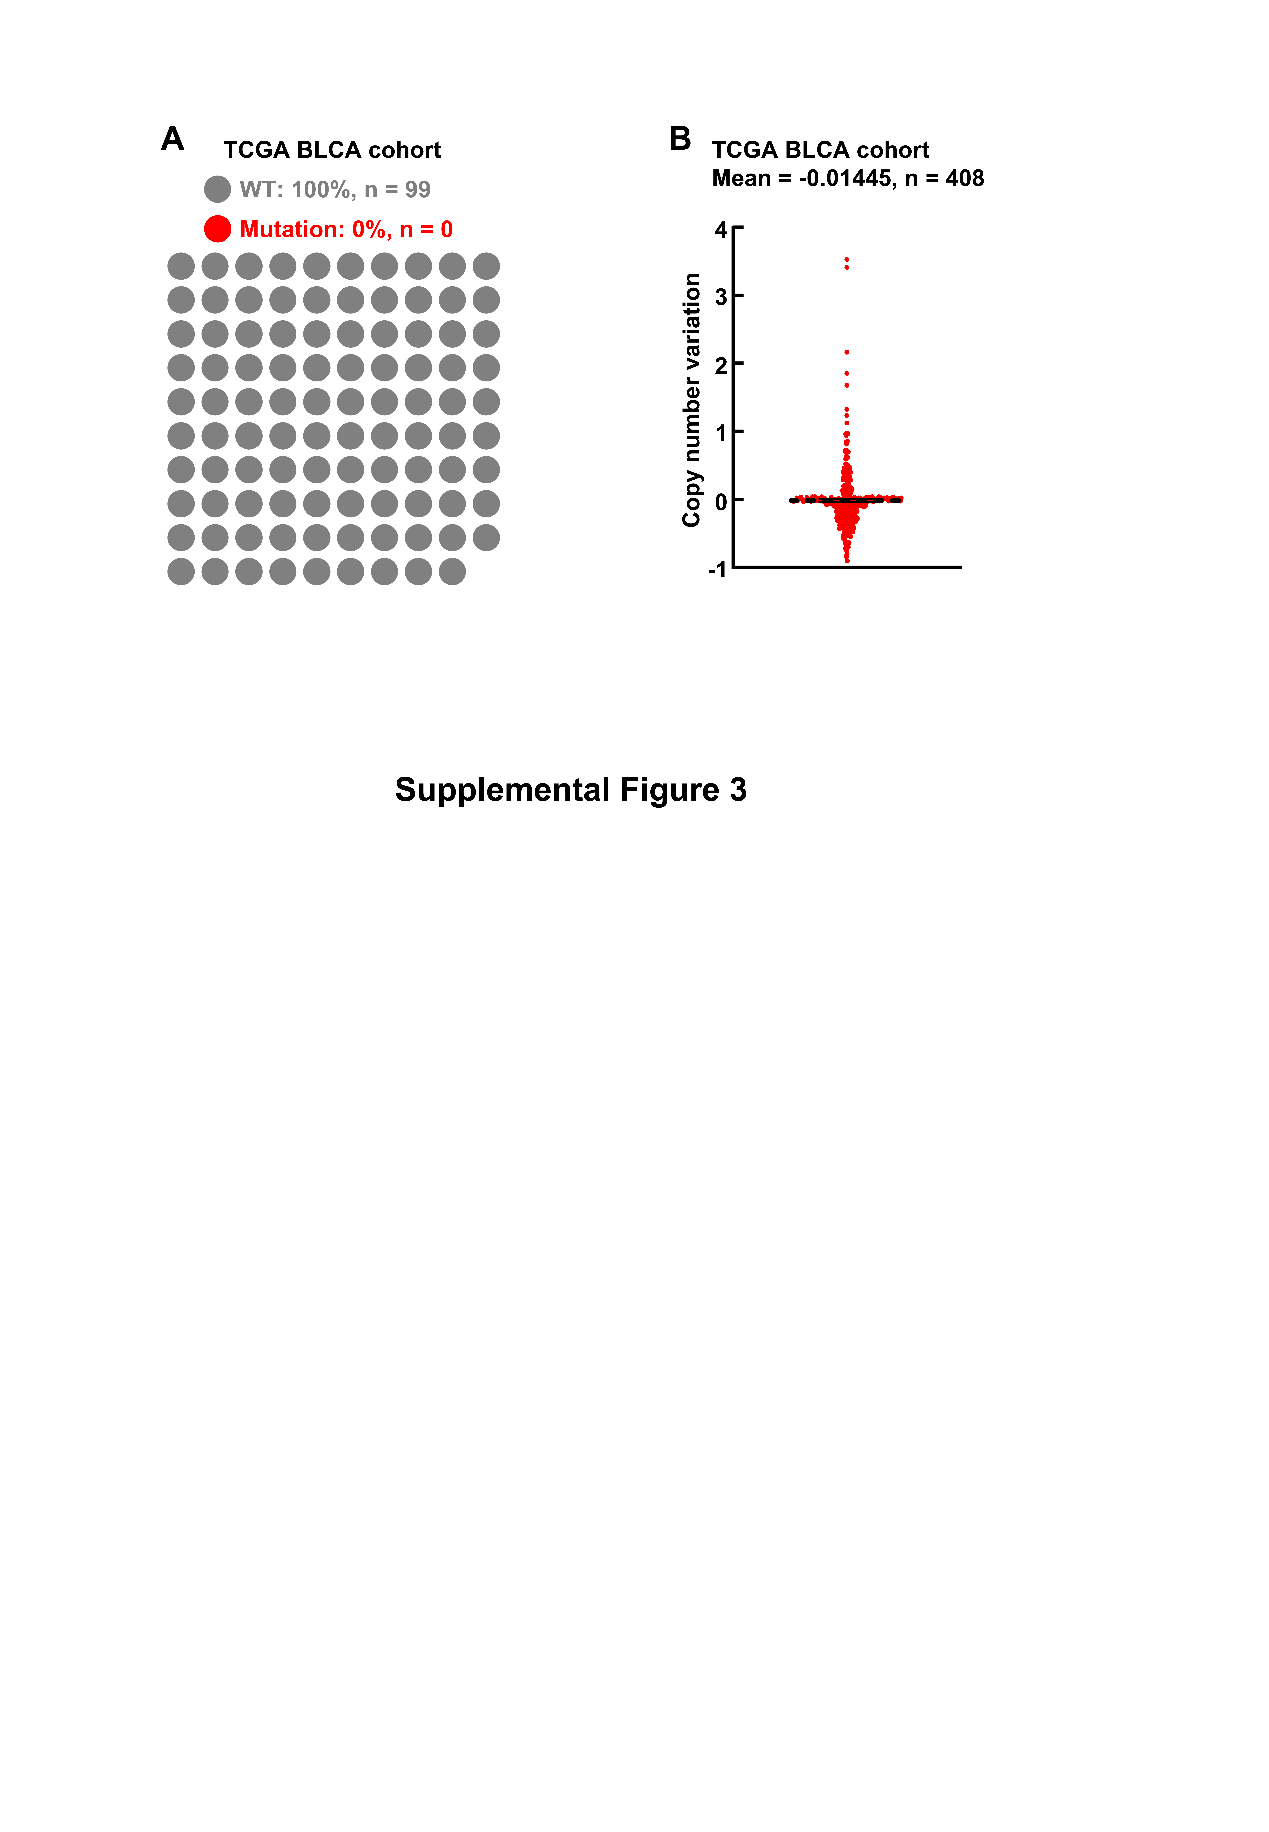

Supplement: Supplementary file 1 [file get_supplementary_file.php]
